1 **Title:** Large-scale changes to mRNA polyadenylation in temporal lobe epilepsy

2

3 **Abbreviated title:** mRNA polyadenylation and epilepsy

4

5 **Authors:** Alberto Parras<sup>1,2,3#</sup>, Laura de Diego-Garcia<sup>3#</sup>, Mariana Alves<sup>3</sup>, Edward Beamer<sup>3</sup>,  
6 Giorgia Conte<sup>3</sup>, James Morgan<sup>3</sup>, Ivana Ollà<sup>1,2</sup>, Yasmina Hernandez-Santana<sup>3</sup>, Norman  
7 Delanty<sup>4,5</sup>, Michael A. Farrell<sup>4</sup>, Donncha F. O'Brien<sup>4</sup>, David C. Henshall<sup>3,5</sup>, Raúl Méndez<sup>6,7</sup>,  
8 José J. Lucas<sup>1,2\*</sup> and Tobias Engel<sup>3,5\*</sup>

9 #These authors contributed equally.

10

11 **Affiliations:**

12 <sup>1</sup>Centro de Biología Molecular 'Severo Ochoa' (CBMSO) CSIC/UAM, 28049 Madrid, Spain

13 <sup>2</sup>Networking Research Center on Neurodegenerative Diseases (CIBERNED), Instituto de  
14 Salud Carlos III, Madrid, Spain

15 <sup>3</sup>Department of Physiology & Medical Physics, Royal College of Surgeons in Ireland, Dublin  
16 2, Ireland

17 <sup>4</sup>Beaumont Hospital, Beaumont, Dublin 9, Ireland

18 <sup>5</sup>FutureNeuro Research Centre, Dublin 2, Ireland

19 <sup>6</sup>Institute for Research in Biomedicine (IRB), Barcelona Institute of Science and Technology,  
20 08028 Barcelona, Spain

21 <sup>7</sup>Institució Catalana de Recerca i Estudis Avançats (ICREA), 08010 Barcelona, Spain

22

23

24 **\*Correspondence:**

25 Tobias Engel, Ph.D., Department of Physiology and Medical Physics, Royal College of  
26 Surgeons in Ireland, 123 St. Stephen's Green, Dublin 2, Ireland

27 Tel: +35 314025199, Fax: +35 314022447, Email: [tengel@rcsi.ie](mailto:tengel@rcsi.ie)

28

29 José J. Lucas, Centro de Biología Molecular 'Severo Ochoa' (CBMSO) CSIC/UAM, C/  
30 Nicolás Cabrera, 1, Campus UAM de Cantoblanco, 28049 Madrid, Spain

31 Tel. +34 911964552, Email: [jjlucas@cbm.csic.es](mailto:jjlucas@cbm.csic.es)

32

33

34 **Abstract**

35 The molecular mechanisms that shape the gene expression landscape during the development  
36 and maintenance of chronic states of brain hyperexcitability are incompletely understood.  
37 Here we show that cytoplasmic mRNA polyadenylation, a posttranscriptional mechanism for  
38 regulating gene expression, undergoes widespread reorganisation in temporal lobe epilepsy.  
39 Specifically, over 25% of the hippocampal transcriptome displayed changes in their poly(A)  
40 tail in mouse models of epilepsy, particular evident in the chronic phase. The expression of  
41 cytoplasmic polyadenylation binding proteins (CPEB1-4) was found to be altered in the  
42 hippocampus in mouse models of epilepsy and temporal lobe epilepsy patients and CPEB4  
43 target transcripts were over-represented among those showing poly(A) tail changes.  
44 Supporting an adaptive function, CPEB4-deficiency leads to an increase in seizure severity  
45 and neurodegeneration in mouse models of epilepsy. Together, these findings reveal an  
46 additional layer of gene expression control during epilepsy and point to novel targets for  
47 seizure control and disease-modification in epilepsy.

48

49

50

51

52

53

54

55

56

57

58

## 59 **Introduction**

60 Epilepsy is one of the most common chronic neurological disorders, affecting approximately  
61 70 million people worldwide<sup>1,2</sup>. Temporal lobe epilepsy (TLE) is the most common  
62 refractory form of epilepsy in adults and typically results from an earlier precipitating insult  
63 that causes structural and functional reorganisation of neuronal-glia networks within the  
64 hippocampus resulting in chronic hyperexcitability<sup>3</sup>. These network changes, which include  
65 selective neuronal loss, gliosis and synaptic remodelling, are driven in part by large-scale  
66 changes in gene expression<sup>4-7</sup>. The gene expression landscape continues to be dysregulated  
67 once epilepsy is established<sup>8</sup>.

68 Recent studies have uncovered important roles for post-transcriptional mechanisms during  
69 the development of epilepsy. These include the actions of small noncoding RNA, such as  
70 microRNA and post-translational control of protein turnover via the proteasome contributing  
71 to altered levels of ion channels, changes in neuronal micro- and macro-structure and glial  
72 responses within seizure-generating neuronal circuits<sup>9-13</sup>. The molecular mechanisms  
73 underlying the transcriptional and translational landscape in epilepsy remain, however,  
74 incompletely understood.

75 In the cell nucleus, the majority of mRNAs acquire a non-templated poly(A) tail. Although  
76 the addition of a poly(A) tail seems to occur by default, the subsequent control of poly(A) tail  
77 length is highly regulated both in the nucleus and cytoplasm<sup>14</sup>. Cytoplasmic mRNA  
78 polyadenylation contributes to the regulation of the stability, transport and translation of  
79 mature transcripts, and is therefore an essential post-transcriptional mechanism for regulating  
80 spatio-temporal gene expression<sup>14</sup>.

81 The cytoplasmic polyadenylation element binding proteins (CPEBs) are sequence-specific  
82 RNA-binding proteins (RNABPs) and key regulators of mRNA translation via the  
83 modulation of poly(A) tail length<sup>15</sup>. The CPEB family is composed of four members in

84 vertebrates (CPEB1-4) with CPEB2-4 sharing more homology than with CPEB<sup>16</sup>. To  
85 function, CPEBs bind to cytoplasmic polyadenylation element (CPE) sequences, located at  
86 the 3' untranslated region (3'UTR) of the target mRNAs. They nucleate a complex of factors  
87 that regulate poly(A) tail length, thereby controlling both translational repression and  
88 activation<sup>15</sup>. In the brain, CPEBs mediate numerous cellular processes including long-term  
89 potentiation, synaptic plasticity and expression of neurotransmitter receptors<sup>17-19</sup>. Functional  
90 roles for CPEBs in brain diseases include CPEB4 a critical regulator of risk genes associated  
91 with autism<sup>21</sup> and as protective against ischemic insults *in vivo*<sup>20</sup>. Notably, evoked seizures  
92 result in increased CPEB4 expression<sup>22</sup> and mice lacking *Cpeb1* and the *Fmr1* gene display  
93 decreased susceptibility to acoustic stimulation-induced seizures<sup>23</sup>. Here, we explored  
94 changes in mRNA polyadenylation in experimental mouse models of epilepsy, revealing  
95 large-scale alterations as a major feature of the gene expression landscape in epilepsy.

96

## 97 **Results**

### 98 **Genome-wide mRNA polyadenylation profiling reveals deadenylation of epilepsy-** 99 **related genes**

100 To investigate whether seizures and epilepsy impact on mRNA polyadenylation, we used the  
101 well characterized intraamygdala kainic acid (KA)-induced status epilepticus mouse model<sup>24</sup>.  
102 In this model of acquired epilepsy, an intraamygdala microinjection of KA leads to status  
103 epilepticus and wide-spread neurodegeneration involving the ipsilateral cortex and CA3  
104 subfield of the hippocampus. All mice treated with intraamygdala KA develop epilepsy  
105 following a short latency period of 3-5 days, experiencing 2-5 seizures per day<sup>24</sup>.  
106 We first used mRNA microarrays to map both, changes in the rate of gene transcription and  
107 potential genome-wide alterations in poly(A) tail length in the ipsilateral hippocampus at two  
108 time-points; 8 hours (h) post-status epilepticus (acute injury) and at 14 days post-status

109 epilepticus (epilepsy) (Fig. 1a). Changes in poly(A) tail length were analyzed via poly(U)  
110 chromatography. Here, by using a differential elution with either 25% or 90% formamide,  
111 total hippocampal mRNA extracts were separated into two fractions, one enriched in mRNAs  
112 with a short and one enriched in mRNAs with a long poly(A) tail, respectively<sup>21</sup> (Fig. 1b).  
113 This approach revealed that large-scale increases in mRNA levels accompany the early phase  
114 after status epilepticus (4991 genes) when compared to established epilepsy (968 genes) (Fig.  
115 1b). Therefore, regulation of mRNA levels seems to dominate the altered gene expression  
116 landscape immediately following status epilepticus which is later reduced in epilepsy. In  
117 sharp contrast to alterations in transcript levels, changes in poly(A) tail length were much  
118 more pronounced in samples from mice with established epilepsy, affecting 28.6% of the  
119 total mRNA pool (6177 genes) when compared to status epilepticus affecting 9.6% of the  
120 genome (2088 genes) (Fig. 1b).

121 In order to identify functional groups of genes and pathways affected by changes in  
122 polyadenylation, transcripts with poly(A) tail alterations were analysed by Gene Ontology  
123 (GO) terms using the bioinformatic tool DAVID<sup>25</sup>. Notably, pathways related to epilepsy  
124 were particularly abundant among genes undergoing a shortening in their poly(A) tail  
125 following status epilepticus and during epilepsy (Extended Data Fig. 1a). Shortening of  
126 selected deadenylated transcripts was validated by high-resolution poly(A) tail (Hire-PAT)  
127 assay (Extended Data Fig. 1b). To explore whether changes in mRNA polyadenylation  
128 disproportionately affect genes implicated in the pathogenesis of epilepsy, we compiled a set  
129 of epilepsy-related genes from three recent independent studies. These studies included: a)  
130 genes where mutations cause epilepsy<sup>26</sup>, b) genes with ultra-rare deleterious variations in  
131 familial genetic generalized epilepsies (GGE) and non-acquired focal epilepsies (NAFE)<sup>27</sup>  
132 and c) genes localized in loci associated with epilepsy<sup>28</sup> (Supplementary Table 2).  
133 Remarkably, transcripts displaying poly(A) tail shortening showed an enrichment in genes

134 implicated in epilepsy at both time-points, post status epilepticus and during epilepsy (Fig.  
135 1b). This enrichment persisted after comparing our dataset with genes specifically expressed  
136 in the brain, thus proving this enrichment to be specific for epilepsy-related genes (Extended  
137 Data Fig. 1c). Genes identified in our array to undergo mRNA deadenylation following status  
138 epilepticus, also showed a reduction in their protein levels, demonstrating that mRNA  
139 deadenylation leads to reduced protein expression. This included the Glutamate ionotropic  
140 receptor NMDA type subunit 2B (GRIN2B), previously shown to play a role during  
141 epilepsy<sup>26</sup>, Syntaxin 6 (STX6) and N6-adenosine-methyltransferase (METTL3), genes not  
142 associated with epilepsy before (Fig. 1c). No significant changes in transcript levels of our  
143 selected genes was observed when analysed post-status epilepticus, further suggesting this  
144 decrease in expression is due to mRNA deadenylation (Fig. 1d). Previous *in vivo* studies  
145 showed that deadenylation, by resulting in decreased protein output, is more disruptive than  
146 poly(A) tail elongation in the brain<sup>21</sup>. Our results therefore indicate that deadenylation may  
147 play a role during the development of epilepsy through diminishing the translation of specific  
148 target genes.

149 Taken together, our results demonstrate changes in mRNA polyadenylation following  
150 seizures and epilepsy affecting over 25% of the total transcriptome with deadenylation  
151 disproportionately affecting transcripts encoding proteins related to epilepsy. Our results,  
152 therefore, reveal mRNA polyadenylation as a previously unrecognized layer of gene  
153 expression control in epilepsy.

154

### 155 **Increased expression of CPEBs in the hippocampus of TLE patients**

156 To identify possible candidate RNA Binding Proteins (RNABPs) responsible for driving  
157 seizure-induced alterations in poly(A) tail length, we first compiled a list of genes whose  
158 transcripts are known to bind to the main RNABPs involved in cytoplasmic polyadenylation<sup>29</sup>

159 including human antigen R (HUR), which prevent deadenylation<sup>30</sup>; PUMILIO, which  
160 promotes deadenylation<sup>31</sup> and CPEBs<sup>21</sup> (Fig. 2a and Supplementary Table 3). This analysis  
161 revealed that CPEB binders were highly enriched among genes that showed poly(A) tail  
162 alterations following status epilepticus and during epilepsy (Fig. 2b). Interestingly, binders of  
163 CPEB1 and of CPEB4 (the latter representing the CPEB2-4 subfamily) have been identified  
164 in the brain<sup>21</sup>; while targets of both CPEBs were increased among genes with poly(A) tail  
165 changes, the percentage of CPEB4 binders was significantly higher when compared to  
166 CPEB1 binders, particularly during epilepsy (Extended Data Fig. 2a).

167 Next, to investigate the expression profile of the CPEB protein family during epilepsy, we  
168 analyzed resected hippocampal tissue obtained from drug-refractory TLE patients. Here, we  
169 found an increased expression of all CPEB family members, in particular of CPEB2 and  
170 CPEB4 (Fig. 2c).

171 Together, the enrichment of CPEB-binders among altered genes and the increased levels of  
172 CPEBs in TLE, indicate that members of the CPEB protein family, particularly the CPEB2-4  
173 subfamily, are likely to be the main drivers of poly(A) tail changes during epilepsy.

174

### 175 **Increased expression of CPEB4 in experimental models of status epilepticus**

176 Next, to provide further evidence of CPEB driving poly(A) tail changes during epilepsy  
177 development, we also analyzed the expression profile of the CPEB protein family in our  
178 mouse models of status epilepticus. Whereas hippocampal *Cpeb3* and *Cpeb4* transcript levels  
179 were increased at the early time points following status epilepticus in the intraamygdala KA  
180 mouse model, no changes were found in *Cpeb1* and *Cpeb2* transcription levels (Fig. 3a). At  
181 the protein level, only CPEB4 was significantly increased at short time-points, starting at 4 h  
182 post-status epilepticus and returning to baseline control levels at 24 h (Fig. 3b), the time-point  
183 at which a slight increase in CPEB1 and slight decrease in CPEB2 protein levels was also

184 observed. Interestingly, increased transcription of *Cpeb4* was most evident in the dentate  
185 gyrus (Extended Data Fig. 3a), a subfield of the hippocampus largely resistant to seizure-  
186 induced neuronal death in the model<sup>24</sup>. CPEB4 protein was also upregulated in the  
187 hippocampus following status epilepticus induced by the cholinergic mimetic pilocarpine  
188 (Extended Data Fig. 3b), another widely used epilepsy model<sup>32</sup>. To provide additional proof  
189 of a role for CPEBs during epilepsy, we analyzed epilepsy-related genes within targets of  
190 CPEB1 and CPEB4 (Supplementary Table 2). Notably, only CPEB4 binders were enriched  
191 within epilepsy-related genes, further suggesting that CPEB4 is an important regulatory  
192 protein during epilepsy (Fig. 3c).

193 In summary, our data show altered expression of CPEBs in the hippocampus following status  
194 epilepticus, in particular CPEB4, with CPEB4 binders being enriched among epilepsy-related  
195 genes.

196

### 197 **Altered CPEB4 function may explain changes in poly(A) tail length in epilepsy**

198 Next, to obtain functional evidence that CPEB4 is responsible for changes in mRNA  
199 polyadenylation occurring during epilepsy, we compared our identified global poly(A) profile  
200 following status epilepticus and during epilepsy to the poly(A) profile present in CPEB4  
201 knock-out (KO) mice<sup>21</sup>. Notably, analysis of the global transcript polyadenylation status in  
202 CPEB4<sup>KO/KO</sup> mice revealed an opposing poly(A) tail length pattern to that observed in our  
203 epilepsy mouse model (Fig. 4a). Moreover, in contrast to the observed polyadenylation  
204 signature during epilepsy, in CPEB4<sup>KO/KO</sup> mice the enrichment in epilepsy-related genes was  
205 found in the set of genes showing poly(A) tail lengthening (Fig. 4b). Together, these results  
206 further corroborate poly(A)-tail alterations observed in our intraamygdala KA mouse model  
207 to be attributable to altered CPEB4 function.

208



## 209 **CPEB4 deficiency increases seizure susceptibility and seizure-induced brain damage**

210 To determine whether mRNA polyadenylation and CPEB4 contribute to brain excitability or  
211 the pathophysiology of status epilepticus, we characterized seizures and their  
212 neuropathological sequelae in CPEB4 heterozygous (CPEB4<sup>KO/+</sup>) and homozygous  
213 (CPEB4<sup>KO/KO</sup>) knockout mice<sup>33</sup>. Immunoblot and transcript analysis confirmed a partial and  
214 full reduction of CPEB4 protein in the hippocampus of heterozygous and homozygous mice,  
215 respectively (Extended Data Fig. 4a). CPEB4-deficient mice also showed normal levels of  
216 different cell-type markers and kainate receptor levels in the hippocampus (Extended Data  
217 Fig. 4b). Furthermore, hippocampal mRNA levels of the neuronal activity-regulated gene *c-*  
218 *Fos* and baseline EEG recordings were similar between wildtype (WT), CPEB4<sup>KO/+</sup> and  
219 CPEB4<sup>KO/KO</sup> mice suggesting loss of CPEB4 does not noticeably alter normal brain function  
220 (Extended Data Fig. 4c, d).

221 We then investigated the impact of CPEB4-deficiency on status epilepticus triggered by an  
222 intraamygdala microinjection of KA. Both CPEB4<sup>KO/+</sup> and CPEB4<sup>KO/KO</sup> mice showed a  
223 shorter latency to the first seizure burst compared to WT mice (Fig. 5a). CPEB4<sup>KO/+</sup> and  
224 CPEB4<sup>KO/KO</sup> mice also experienced more severe seizures, as evidenced by higher total power  
225 (Fig. 5b, c) and amplitude (Extended data Fig. 4e) during the time of KA injection until the  
226 administration of the anticonvulsant lorazepam 40 min later. This increase in seizure severity  
227 persisted for an additional 60 min recording period in CPEB4<sup>KO/KO</sup> mice (Fig. 5b, c).  
228 Analysis of high frequency high amplitude (HFHA) paroxysmal discharges which correlate  
229 with seizure-induced brain pathology<sup>34</sup>, revealed that both CPEB4<sup>KO/+</sup> and CPEB4<sup>KO/KO</sup> mice  
230 showed longer durations of HFHA spiking (Fig. 5d). Behavioral seizures were also more  
231 severe in CPEB4<sup>KO/+</sup> and CPEB4<sup>KO/KO</sup> mice during status epilepticus (Fig. 5e). Next, we  
232 analysed brain sections to determine whether loss of CPEB4 affects neuropathological  
233 outcomes. Status epilepticus in the intraamygdala model produces a characteristic lesion

234 within the ipsilateral CA3 subfield comprising select neuron loss and gliosis. Both  
235 CPEB4<sup>KO/+</sup> and CPEB4<sup>KO/KO</sup> mice displayed increased neuronal death following status  
236 epilepticus as evidenced by more Fluorojade (FjB)-positive cells in all subfields of the  
237 hippocampus and in the cortex (Fig. 5f, g).

238 We also investigated neuropathological outcomes in a second model. CPEB4<sup>KO/+</sup> mice  
239 subjected to status epilepticus induced by intraperitoneal pilocarpine showed increased  
240 mortality (Extended data Fig. 5a) and underwent more severe seizures (Extended data Fig.  
241 5b, c), including longer durations of HFHA spiking (Extended data Fig. 5d). Analysis of  
242 brain sections from these mice also identified more neurodegeneration in the hippocampus  
243 and cortex of CPEB4<sup>KO/+</sup> mice compared to WT controls (Extended data Fig. 5e).

244 Together, our results demonstrate that loss of CPEB4 increases vulnerability to seizures and  
245 hippocampal damage indicating that CPEB4 is an important regulator of brain excitability  
246 and seizure-induced neurodegeneration.

247

## 248 **Discussion**

249 In the present study, we are the first to describe changes in the global mRNA polyadenylation  
250 profile following status epilepticus and during epilepsy. This represents an important post-  
251 transcriptional level of regulation of gene expression in which CPEBs play a key role. This is  
252 evidenced by bioinformatics analysis of various RNABPs and of epilepsy-related genes,  
253 together with the alteration of CPEBs in samples from human TLE and KA mouse models.  
254 We further identify CPEB4 as a key neuroprotective regulator of mRNA polyadenylation  
255 during epilepsy, and this is corroborated in CPEB4-deficient mice.

256 Despite the availability of over 25 anti-epileptic drugs (AEDs), pharmacological  
257 interventions remain ineffective in 30% of patients and, even when seizure-suppressive,  
258 current AEDs are merely symptomatic and have no beneficial effect on the development of

259 epilepsy<sup>35</sup>. While both acute status epilepticus and chronic epilepsy are characterized by  
260 altered gene transcription, other post-transcriptional and post-translational mechanisms have  
261 been shown to be crucial during the development of epilepsy<sup>36</sup>. We are, however, still far  
262 from a complete picture of the pathological molecular changes occurring during  
263 epileptogenesis and epilepsy, a critical requirement for the development of much needed new  
264 therapeutic strategies. Adding to the complexity of gene regulation during epileptogenesis,  
265 we have now identified a novel regulatory gene expression mechanism, cytoplasmic mRNA  
266 polyadenylation, potentially contributing to how protein expression is controlled during  
267 epilepsy and thereby contributing to the generation of hyperexcitable networks.

268 Besides the long-known role of CPEB-dependent cytoplasmic mRNA polyadenylation during  
269 early development, a role has more recently been recognized in the adult brain<sup>18</sup>, where it is  
270 associated with synaptic plasticity, long-term potentiation, learning and memory<sup>37</sup>. Long  
271 forms of synaptic plasticity involving prion-like tag-mechanisms are particularly reliant on  
272 CPEB-dependent polyadenylation<sup>38</sup>. Epilepsy is a long lasting persistence of the  
273 hyperexcitability observed in status epilepticus and, thus, amenable to be regulated by CPEB-  
274 and poly(A)-mediated post-transcriptional regulation. In fact, while transcriptional changes  
275 are profuse during status epilepticus, they decline in epilepsy, while the percentage of genes  
276 showing altered poly(A) tail length increases from status epilepticus to epilepsy, with almost  
277 30% of the genome affected in chronic epilepsy. These results suggest that transcriptional  
278 changes may predominate in the early phases of hyperexcitability while poly(A)-dependent  
279 regulation plays a larger role in the maintenance of epilepsy.

280 Despite multiple lines of evidence pointing to a key role of CPEBs in poly(A) changes in  
281 epilepsy reported here, we cannot however exclude a contribution of other RNABPs such as  
282 HUR or PUMILIO, which have previously been associated with epilepsy<sup>39,40</sup>. Similarly,  
283 among the various CPEBs, we show here that CPEB4 is a key player in epilepsy related

284 poly(A)-dependent gene regulation, but we cannot discard that other CPEBs also play a role.  
285 The strongest evidence suggesting a role for CPEB4 include its early increase in expression  
286 following acute seizures in two mouse models of status epilepticus and that a polyadenylation  
287 profile opposite to the one observed during epilepsy is observed in CPEB4 knock-out mice.  
288 Our data indicate that CPEB4 induction during epileptogenesis is neuroprotective and that the  
289 high levels of expression found in human TLE patient tissue most likely represent an  
290 endogenous antiepileptogenic adaptive mechanism to protect the brain once pathological  
291 processes are initiated. Accordingly, CPEB4 deficiency in mice, despite having no apparent  
292 impact on normal brain physiology<sup>41</sup>, lowers the seizure threshold upon challenge with  
293 proconvulsants and leads to an increase in seizure severity and resulting brain damage.  
294 Interestingly, further evidence of the neuroprotective role of CPEB4 was also previously  
295 obtained in an *in vitro* model of ischaemia<sup>20</sup>.  
296 In conclusion, our results uncover cytoplasmic mRNA polyadenylation as an important layer  
297 of gene expression regulation in epilepsy, which must be considered when analyzing  
298 molecular patho-mechanisms during epileptogenesis and open the door for the development  
299 of novel therapies targeting mRNA polyadenylation for the treatment of drug-refractory  
300 epilepsy.

301

## 302 **Methods**

303

### 304 **Human brain tissue**

305 This study was approved by the Ethics (Medical Research) Committee of Beaumont Hospital,  
306 Dublin (05/18), and written informed consent was obtained from all patients. Briefly, patients  
307 (n = 6) were referred for surgical resection of the temporal lobe for the treatment of  
308 intractable TLE. After temporal lobe resection, hippocampi were obtained and frozen in  
309 liquid nitrogen and stored at  $-70^{\circ}\text{C}$  until use. A pathologist (Dr. Michael Farrell) assessed  
310 hippocampal tissue and confirmed the absence of significant neuronal loss. Control (autopsy)  
311 temporal hippocampus (n = 6) was obtained from individuals from the Brain and Tissue Bank  
312 for Developmental Disorders at the University of Maryland, Baltimore, MD, U.S.A. Samples  
313 were processed for Western blot analysis. Brain sample and donor metadata are available in  
314 Supplementary Table 4.

315

### 316 **Animal models of status epilepticus and epilepsy**

317 Animal experiments were carried out in accordance with the principles of the European  
318 Communities Council Directive (2010/63/EU). Procedures were reviewed and approved by  
319 the Research Ethics Committee of the Royal College of Surgeons in Ireland (REC 1322) and  
320 the Irish Health Products Regulatory Authority (HPRA) (AE19127/P038). All efforts were  
321 maximized to reduce the number of animals used in this study. Mice used in our experiments  
322 were 8-12 weeks old male and female C57Bl/6, obtained from Harlan Laboratories (Bicester,  
323 UK) and from the Biomedical Research Facility (BRF), Royal College of Surgeons in Ireland  
324 (Dublin, Ireland). CPEB4-deficient mice (CPEB4<sup>KO/+</sup>, CPEB4<sup>KO/KO</sup>) harbour a heterozygous  
325 or homozygous deletion of constitutive exon 2, respectively, resulting in a premature stop  
326 codon and thereby a partial or full suppression of CPEB4 protein expression<sup>33</sup>. Animals were

327 housed in a controlled biomedical facility on a 12 h light/dark cycle at  $22\pm 1$  °C and humidity  
328 of 40-60% with food and water provided *ad libitum*. Status epilepticus was induced as  
329 described previously either via an intraamygdala injection of KA or an intraperitoneal  
330 injection of pilocarpine<sup>42</sup>. Before implantation of cannulas (intraamygdala KA injection) and  
331 electrodes (EEG recordings), mice were anesthetized using isoflurane (5% induction, 1-2%  
332 maintenance) and maintained normothermic by means of a feedback-controlled heat blanket  
333 (Harved Apparatus Ltd, Kent, UK). Next, mice were placed in a stereotaxic frame and a  
334 midline scalp incision was performed to expose the skull. A guide cannula (coordinates from  
335 Bregma; AP = -0.94 mm, L = -2.85 mm) and three electrodes (Bilaney Consultants Ltd,  
336 Sevenoaks, UK), two above each hippocampus and one above the frontal cortex as reference,  
337 were fixed in place with dental cement. Intraamygdala KA (0.3 µg KA in 0.2 µl phosphate-  
338 buffered saline (PBS)) (Sigma-Aldrich, Dublin, Ireland) was administered into the basolateral  
339 amygdala nucleus. Vehicle-injected control animals received 0.2 µl of PBS. To reduce  
340 morbidity and mortality, mice were treated with an i.p. injection of the anticonvulsant  
341 lorazepam (6 mg/kg) 40 min post-KA or PBS injection (Wyetch, Taplow, UK). As described  
342 previously, all mice develop epilepsy after a short latency period of 3-5 days<sup>24</sup>. Status  
343 epilepticus was also induced by an i.p. injection of pilocarpine (340 mg/kg body weight)  
344 (Sigma-Aldrich, Dublin, Ireland) 20 min following the injection of methyl-scopolamine (1  
345 mg/kg) (Sigma-Aldrich, Dublin, Ireland)<sup>42</sup>. Mice were treated with i.p. lorazepam (6 mg/kg)  
346 90 min following i.p. pilocarpine. EEG was recorded using the Xltek recording system  
347 (Optima Medical Ltd, Guildford, UK) starting 20 min before administration of pro-  
348 convulsant (KA or pilocarpine) to record baseline and during status epilepticus (40 min for  
349 intraamygdala KA-treated mice and 90 min for mice treated with i.p. pilocarpine). EEG was  
350 continued for 1 h post-administration of lorazepam. Mice were euthanized at different time-  
351 points following status epilepticus (1 h, 4 h, 8 h, 24 h) and during chronic epilepsy (14 days)

352 and brains flash-frozen whole in 2-methylbutane at  $-30^{\circ}\text{C}$  for FjB staining, perfused with  
353 PBS and paraformaldehyde (PFA) 4% for immunofluorescence or microdissected and frozen  
354 for protein or RNA extraction.

355

### 356 **Poly(U) chromatography**

357 C57Bl/6 WT mice were sacrificed 8 h following status epilepticus (acute pathology) (KA and  
358 PBS,  $n = 9$  per group) or 14 days post-status epilepticus (time-point at which all mice suffer  
359 from chronic epilepsy<sup>24</sup>) (KA and PBS,  $n = 9$  per group). Ipsilateral hippocampi were quickly  
360 dissected, pooled into 3 groups ( $n = 3$  per pooled sample) and stored at  $-80^{\circ}\text{C}$  until use. RNA  
361 was extracted using the Maxwell® 16 LEV simplyrna Tissue Kit (Promega, AS1280).  
362 Poly(A) RNA fraction was purified by poly(U) chromatography as before<sup>43</sup>. Poly(U)-agarose  
363 (Sigma, p8563) was suspended in swelling buffer (0.05 M Tris-HCl, pH 7.5, 1 M NaCl) 35  
364 ml/g, incubated overnight at room temperature and loaded into a chromatography column. An  
365 aliquot of total RNA was stored at  $-80^{\circ}\text{C}$  (“Input”) and the remaining sample incubated with  
366 sample buffer (0.01 M Tris-HCl, pH 7.5, 1 mM EDTA, 1% SDS) for 5 min at  $65^{\circ}\text{C}$  and  
367 chilled on ice. Binding buffer was added (0.05 M Tris-HCl, pH 7.5, 0.7 M NaCl, 10 mM  
368 EDTA, 25% [v/v] formamide) which was followed by loading of samples into the poly(U)-  
369 agarose chromatography column (Mobitec, M1002s). Samples were then incubated for 30  
370 min at room temperature ( $25^{\circ}\text{C}$ ) with agitation. Next, columns containing samples were  
371 washed three times at  $25^{\circ}\text{C}$  and six times at  $55^{\circ}\text{C}$  with washing buffer (0.05 M Tris-HCl, pH  
372 7.5, 0.1 M NaCl, 10 mM EDTA, 25% [v/v] formamide). The  $55^{\circ}\text{C}$  washes were collected and  
373 stored at  $-80^{\circ}\text{C}$  (“Short poly(A)-tail fraction”). The remaining poly(A) RNA (“Long poly(A)-  
374 tail fraction”) was eluted with elution buffer (0.05 M HEPES, pH 7, 10 mM EDTA, 90%  
375 [v/v] formamide) at  $55^{\circ}\text{C}$  and stored at  $-80^{\circ}\text{C}$ . RNA of the two poly(A) fractions was  
376 precipitated by adding 1 volume of isopropanol, 1/10<sup>th</sup> volume of sodium acetate 3 M pH 5.2

377 and 20 µg of glycogen (Sigma, G1767). Samples were incubated at -20°C for 20 min and  
378 centrifuged for 15 min at 14000 g at 4°C. Supernatant was removed and pellet was washed  
379 with 750 µl of ethanol and centrifuged at 14000 g at 4°C for 5 min. Then supernatant was  
380 removed again and pellet was air-dried for 5 min. Next, RNAs were resuspended in 300 µl of  
381 nuclease-free water and 300 µl of acid Phenol:Chloroform (5:1) were added. Then, samples  
382 were vortexed and centrifuged for 10 min at 14000 g at 4°C. The aqueous phase was  
383 recovered, mixed with 1 volume of chloroform, vortexed and centrifuged again. The aqueous  
384 phase was recovered and precipitated again using the isopropanol precipitation. To confirm  
385 the average length in each fragment, when setting up the method, we performed digestion of  
386 the non-poly(A) mRNA regions followed by end-labelling of the poly(A) tail for each eluted  
387 fraction and Urea-PAGE. Ensuring proper functioning of our technique, poly(A)-tail changes  
388 were assessed by HIRE-PAT assays of control genes in Input, Washed and Eluted fractions.  
389 RNA quantification was performed by Qubit Fluorimeter using Qubit RNA Hs Assay kit  
390 (Thermo-Fisher Scientific, Q32852). RNA integrity QC was performed with Agilent  
391 Bioanalyzer 2100, using RNA Nano Assay (Agilent Technologies 5067-1511) and RNA Pico  
392 Assay (Agilent Technologies 5067-1513).

393

#### 394 **GeneAtlas MG-430 PM microarray analysis**

395 cDNA library preparation and amplification were performed according to the manufacturer's  
396 instructions (Sigma-Aldrich) using the WTA2 kit with 25 ng starting material. cDNA was  
397 amplified for 17 cycles and purified using PureLink Quick PCR Purification Kit (Invitrogen,  
398 K310001). Quantification of amplified cDNA was carried out on a Nanodrop ND-1000  
399 spectrophotometer (Thermo-Fisher Scientific, Waltham, MA, USA). 8.5 µg of the cDNA  
400 from each sample were fragmented and labelled with GeneChip Mapping 250K Nsp assay kit  
401 (Affymetrix, 900753) following the manufacturer's instructions. Hybridization was



402 performed using the GeneAtlas Hyb, Wash and Stain Kit for 3' IVT arrays. Samples ready to  
403 hybridize were denatured at 96°C for 10 min prior to incubation with mouse MG-430 PM  
404 Array Strip (Affymetrix, 901570). Hybridization was performed for 16 h at 45°C in the  
405 GeneAtlas Hybridization Oven (Affymetrix, 00-0331). Washing and staining steps after  
406 hybridization were performed in the GeneAtlas Fluidics Station (Affymetrix, 00-0079),  
407 following the specific script for Mouse MG-430 PM Arrays. Finally, arrays were scanned  
408 with GeneAtlas Scanner (Affymetrix) using default parameters, and the generation of CEL  
409 files for bioinformatics analysis was performed using GeneAtlas software (Affymetrix).  
410 Processing of microarray samples was performed using R<sup>44</sup> and Bioconductor<sup>45</sup>. Raw CEL  
411 files were normalized using RMA background correction and summarization<sup>46</sup>. Standard  
412 quality controls were performed in order to identify abnormal samples<sup>47</sup> regarding: a) spatial  
413 artefacts in the hybridization process (scan images and pseudo-images from probe level  
414 models); b) intensity dependences of differences between chips (MvA plots); c) RNA quality  
415 (RNA digest plot); and d) global intensity levels (boxplot of perfect match log-intensity  
416 distributions before and after normalization and RLE plots). Probeset annotation was  
417 performed using the information available on the Affymetrix web page  
418 (<https://www.affymetrix.com/analysis/index.affx>) using version na35. Expression values  
419 were adjusted for technical biases as described<sup>48</sup> using a linear model and implemented with  
420 the R package "limma"<sup>49</sup>. For each biological replicate the log<sub>2</sub> fold change was computed  
421 between "WASHED (Short)" and "ELUTED (Long)" samples and used to find significant  
422 differences between intraamygdala KA or vehicle-treated control mice sacrificed at two  
423 different time-points (8 h (acute) and 14 days (chronic epilepsy) following status epilepticus).  
424 Differential expression was performed using a linear model with fluidics and amplification  
425 batch as covariates. *P*-values were adjusted with the Benjamini and Hochberg correction. We  
426 considered one transcript as shortened when *P*-value was < 0.05 and FC was negative and

427 lengthened when  $P$ -value was  $< 0.05$  and FC was positive, in at least one probe. If the same  
428 transcript showed opposite results for different probes, the poly(A) tail was considered as not  
429 changed.

430

### 431 **Gene Ontology analysis**

432 Genes with changes in poly(A) tail length between intraamygdala KA or vehicle control mice  
433 sacrificed at two different time-points (8 h and 14 days following status epilepticus) were  
434 analysed by GO terms with the bioinformatic tool DAVID Bioinformatics Resources 6.7<sup>25</sup>.

435

### 436 **High-Resolution poly(A) tail (HIRE-PAT) assay**

437 To measure poly(A) tail length of mRNAs, USB® Poly(A) Tail-Length Assay Kit  
438 (Affymetrix, 76455) based on the HIRE-PAT method was performed. We used total RNA  
439 obtained of Washed and Eluted fractions (enriched in mRNA short and long poly(A) tail  
440 respectively), from the ipsilateral hippocampi of mice sacrificed 8 h following status  
441 epilepticus. G/I tailing (1  $\mu$ g of total RNA) and reverse transcription were performed  
442 according to the manufacturer's instructions. Poly(A) tail size was determined by subtracting  
443 the PCR amplicon size obtained with the Universal primer and forward specific primers. To  
444 verify that the measured poly(A) tail corresponds to a specific gene, at least two different  
445 forward specific primers were tested (Supplementary Table 5). PCR products were resolved  
446 on a 2.5% sybr green agarose gel (Biotium, 41004) run at 120 V for 1.5 h.

447

### 448 **Western blot**

449 Western blot was carried out as before<sup>42</sup>. Samples (mouse and human) were prepared by  
450 homogenizing extracted brain tissue in ice-cold extraction buffer (20 mM HEPES pH 7.4,  
451 100 mM NaCl, 20 mM NaF, 1% Triton X-100, 1 mM sodium orthovanadate, 1  $\mu$ M okadaic

452 acid, 5 mM sodium pyrophosphate, 30 mM  $\beta$ -glycerophosphate, 5 mM EDTA, protease  
453 inhibitors (Complete, Roche, Cat. No 11697498001)). Protein concentration was determined  
454 by Quick Start Bradford kit assay (Bio-Rad, 500-0203) or BCA (Thermo Scientific, Ref  
455 23235) following the manufacturer's instructions. Between 15 - 40  $\mu$ g of total protein were  
456 electrophoresed on 8 - 10% sodium dodecyl sulfate (SDS)-polyacrylamide gel, transferred to  
457 a nitrocellulose blotting membrane (Amersham Protran 0.45  $\mu$ m, GE Healthcare Life  
458 Sciences, 10600002) and blocked in TBS-T (150 mM NaCl, 20 mM Tris-HCl, pH 7.5, 0.1%  
459 Tween 20) supplemented with 5% non-fat dry milk. Membranes were incubated overnight at  
460 4°C with the primary antibody in TBS-T supplemented with 5% non-fat dry milk. On the next  
461 day, following washing with TBS-T, membranes were incubated with secondary HRP-  
462 conjugated anti-mouse or anti-rabbit IgG (1:1000, Jackson Immuno 266 Research, Plymouth,  
463 PA, U.S.A), or anti-goat IgG-Fc fragment (1:5000, Bethyl, A50-104P) and protein bands  
464 visualized using chemiluminescence Merck Millipore, Billerica, MA, U.S.A (Pierce  
465 Biotechnology, Rockford, IL, USA). Gel bands were captured using a Fujifilm LAS-4000  
466 (Fujifilm, Tokyo, Japan), analysed using Alpha-EaseFC4.0 software and quantified using  
467 ImageJ software<sup>50</sup>. Protein quantity was normalized to the loading control (ACTB or  
468 GAPDH). The following primary antibodies were used: rabbit GRIN2B (1:1000, Abcam,  
469 ab65783); rabbit METTL3 (1:1000, Abcam, ab195352); mouse STX6 (1:1000, BD  
470 transduction Laboratories, Cat 610635); rabbit CPEB1 (1:350, Santacruz, sc-33193, for  
471 human samples and 1:1000, proteintech, 13274-1-AP for mouse samples); rabbit CPEB2  
472 (1:1000, Abcam, ab51069); rabbit CPEB3 (1:1000, Abcam, ab10883); rabbit CPEB4  
473 (1:1000, Abcam, ab83009); rabbit NEUN (1:1000, Millipore, ABN78); mouse GFAP  
474 (1:1000, Sigma, G3893); rabbit GLUR6/7 (1:1000, Millipore, 1497226); mouse ACTB  
475 (1:5000, Sigma, A2228); mouse GAPDH (1:5000, Cell Signaling Technology, 14C10);  
476

## 477 **RNA extraction and quantitative polymerase chain reaction (qPCR)**

478 RNA extraction was performed using the Trizol method, as described before<sup>42</sup>. Quantity and  
479 quality of RNA was measured using a Nanodrop Spectrophotometer (Thermo Scientific,  
480 Rockford, IL, U.S.A). Samples with a 260/280 ratio between 1.8 – 2.2 were considered  
481 acceptable. 500 ng of total mRNA was used to produce complementary DNA (cDNA) by  
482 reverse transcription using SuperScript III reverse transcriptase enzyme (Invitrogen, CA,  
483 U.S.A) primed with 50 pmol of random hexamers (Sigma, Dublin, Ireland). qPCR was  
484 performed using the QuantiTech SYBR Green kit (Qiagen Ltd, Hilden, Germany) and the  
485 LightCycler 1.5 (Roche Diagnostics, GmbH, Mannheim, Germany). Each reaction tube  
486 contained 2 µl cDNA sample, 10 µl SyBR green Quantitect Reagent (Quiagen Ltd, Hilden,  
487 Germany), 1.25 µM primer pair (Sigma, Dublin, Ireland) and RNase free water (Invitrogen,  
488 CA, U.S.A) to a final volume of 20 µl. Using LightCycler 1.5 software, data were analysed  
489 and normalized to the expression of *Actb*. Primers used are detailed in Supplementary Table 5.

490

## 491 **Enrichment analysis**

492 To evaluate whether a gene set is enriched over the background, enrichment analysis studies  
493 were carried out using one-sided Fisher's exact test. For our analysis, we used curated gene  
494 lists of epilepsy-related genes generated from three independent studies. This included genes  
495 with mutation that cause epilepsy (n = 84); mutations in these genes cause pure or relatively  
496 pure epilepsies, or syndromes with epilepsy as the core symptom<sup>26</sup>. Genes with ultra-rare  
497 deleterious variation in familial genetic generalized epilepsy (GGE) and non-acquired focal  
498 epilepsy (NAFE) (n = 18); we chose the most significant genes per group (top 15)<sup>27</sup>. Genes  
499 localized in loci associated with epilepsy (n = 21); the 21 most likely epilepsy genes at these  
500 loci, with the majority in genetic generalized epilepsies, were selected<sup>28</sup>. The complete set of  
501 epilepsy-related genes used in our study is shown in Supplementary Table 2.

## 502 **Identification of mRNA targets of RNA binding proteins**

503 CPEB1 and CPEB4 binders were determined previously by RNA immunoprecipitation<sup>21</sup>;  
504 PUM1 and PUM2 targets were identified by individual nucleotide resolution CLIP (iCLIP)<sup>31</sup>;  
505 genes that interact with HUR were identified by photoactivatable ribonucleoside-enhanced  
506 crosslinking and immunoprecipitation (PAR-CLIP)<sup>30</sup>. The complete list of RNABP targets is  
507 shown in Supplementary Table 3. The list of brain-specific genes was obtained from the  
508 human protein atlas (<http://proteatlas.org/humanproteome/brain>).

509

## 510 **Electroencephalogram (EEG) analysis**

511 To analyse EEG frequency, amplitude signal (power spectral density and EEG spectrogram  
512 of the data) and seizures onset, EEG data was uploaded into Labchart7 software (AD  
513 instruments Ltd, Oxford, UK). EEG total power ( $\mu V^2$ ) is a function of EEG amplitude over  
514 time and was analysed by integrating frequency bands from 0 to 100 Hz. Power spectral  
515 density heat maps were generated using LabChart (spectral view), with the frequency domain  
516 filtered from 0 to 40 Hz and the amplitude domain filtered from 0 to 50 mV. The duration of  
517 high-frequency (>5 Hz) and high-amplitude (>2 times baseline) (HFHA) polyspike  
518 discharges of  $\geq 5$  s duration, synonymous with injury-causing electrographic activity<sup>34</sup>, were  
519 counted manually by a reviewer who was blinded to treatment. Seizure onset was calculated  
520 as first seizure burst from time of intraamygdala KA injection.

521

## 522 **Behaviour assessment of seizure severity**

523 Changes in seizure-induced behaviour were scored according to a modified Racine Scale as  
524 reported previously<sup>51</sup>. Score 1, immobility and freezing; Score 2, forelimb and or tail  
525 extension, rigid posture; Score 3, repetitive movements, head bobbing; Score 4, rearing and  
526 falling; Score 5, continuous rearing and falling; Score 6, severe tonic-clonic seizures. Mice

527 were scored by an observer blinded to treatment every 5 min for 40 min after KA injection.  
528 The highest score attained during each 5 min period was recorded.

529

### 530 **Fluoro-Jade B staining**

531 To assess status epilepticus-induced neurodegeneration, FjB staining was carried out as  
532 before<sup>52</sup>. Briefly, 12 µm coronal sections at the medial level of the hippocampus (Bregma AP  
533 = -1.94 mm) were cut on a cryostat. Tissue was fixed in formalin, rehydrated in ethanol, and  
534 then transferred to a 0.006% potassium permanganate solution followed by incubation with  
535 0.001% FjB (Chemicon Europe Ltd, Chandlers Ford, UK). Sections were mounted in DPX  
536 mounting solution. Then, using an epifluorescence microscope, cells including all  
537 hippocampal subfields (dentate gyrus (DG), CA1 and CA3 regions) and cortex were counted  
538 by a person unaware of treatment under a 40x lens in two adjacent sections and the average  
539 determined for each animal.

540

### 541 **Data analysis**

542 Statistical analysis was performed using SPSS 21.0 (SPSS® Statistic IBM®). Data are  
543 represented as mean ± S.E.M. (Standard Error of the Mean) with 95% confidence interval.  
544 The normality of the data was analysed by Shapiro-Wilk test ( $n < 50$ ) or Kolmogorov-  
545 Smirnov ( $n > 50$ ). Homogeneity of variance was analysed by Levene test. For comparison of  
546 two independent groups, two-tail unpaired t-Student's test (data with normal distribution),  
547 Mann-Whitney-Wilcoxon or Kolmogorov-Smirnov tests (with non-normal distribution) was  
548 performed. To compare dependent measurements, we used a paired t-test (normal  
549 distribution) or Wilcoxon signed-rank tests (non-normal). For multiple comparisons, data  
550 with a normal distribution were analysed by one way-ANOVA test followed by a Tukey's or  
551 a Games-Howell's post-hoc test. Statistical significance of non-parametric data for multiple

552 comparisons was determined by Kruskal-Wallis one-way ANOVA test. Enrichment tests  
553 were carried out by using one-sided Fisher's exact test. A critical value for significance of  $P <$   
554 0.05 was used throughout the study.

555

556 **Data availability.** The data that support the findings of this study are available from the  
557 corresponding authors upon reasonable request. All records have been approved and assigned  
558 GEO accession numbers, however, until the acceptance of the manuscript, these will be kept  
559 private. GSE132523 - Identification of the mRNA polyadenylation profile in the  
560 hippocampus following intraamygdala kainic acid-induced of status epilepticus in mice

561

## 562 **Acknowledgments**

563 This work was supported by funding from the Health Research Board HRA-POR-2015-1243  
564 to TE; Science Foundation Ireland (13/SIRG/2098 and 17/CDA/4708 to T.E and co-funded  
565 under the European Regional Development Fund and by FutureNeuro industry partners  
566 16/RC/3948 to D.C.H); from the H2020 Marie Skłodowska-Curie Actions Individual  
567 Fellowship (796600 to L.D-G and 753527 to E.B), from the European Union's Horizon 2020  
568 research and innovation programme under the Marie Skłodowska-Curie grant agreement (No.  
569 766124 to T.E.), from ISCIII-CiberNed-PI2013/09 and SAF2015-65371-R and RTI2018-  
570 096322-B-I00 to J.J.L., A.P. was recipient of a CIBERNED-Ayuda a la movilidad. We thank  
571 the following core facilities: IRB-Functional Genomic and IRB-Bioinformatics/Biostatistics.

572

## 573 **Author contributions**

574 A.P. performed bioinformatics and statistical analysis, L.D.-G. performed and was involved  
575 in most of experiments, and A.P. and L.D.-G contributed to study design and were involved  
576 in all assays and data collection. M.A. performed Western-Blot, qRT-PCR and EEG and data

577 analysis. E.B. performed mouse modelling and behavioural studies. G.C. contributed to the  
578 microarray analysis. J.M. analysed data. I.O. performed semiquantitative qRT-PCR. Y.H.-S  
579 carried out Western-Blot and qRT-PCR analysis. N.D., M.A.F. and D.F.O. provided human  
580 tissue. D.C.H. and R.M. made intellectual contributions to experimental design and  
581 discussion. J.J.L. and T.E. directed and conceived the study. T.E. wrote the paper with input  
582 from all authors.

583

#### 584 **Conflict of Interest**

585 The authors declare no competing interests. We confirm that we have read the Journal's  
586 position on issues involved in ethical publication and affirm that this report is consistent with  
587 those guidelines.

588



## 589 References

- 590 1 Devinsky, O. *et al.* Epilepsy. *Nat Rev Dis Primers* **4**, 18024, doi:10.1038/nrdp.2018.24 (2018).
- 591 2 Thijs, R. D., Surges, R., O'Brien, T. J. & Sander, J. W. Epilepsy in adults. *Lancet* **393**, 689-701,  
592 doi:10.1016/S0140-6736(18)32596-0 (2019).
- 593 3 Nearing, K., Madhavan, D. & Devinsky, O. Temporal lobe epilepsy: a progressive disorder? *Rev Neurol Dis*  
594 **4**, 122-127 (2007).
- 595 4 Okamoto, O. K. *et al.* Whole transcriptome analysis of the hippocampus: toward a molecular portrait of  
596 epileptogenesis. *BMC Genomics* **11**, 230, doi:10.1186/1471-2164-11-230 (2010).
- 597 5 Pitkanen, A. & Lukasiuk, K. Mechanisms of epileptogenesis and potential treatment targets. *Lancet Neurol*  
598 **10**, 173-186, doi:10.1016/S1474-4422(10)70310-0 (2011).
- 599 6 Goldberg, E. M. & Coulter, D. A. Mechanisms of epileptogenesis: a convergence on neural circuit  
600 dysfunction. *Nat Rev Neurosci* **14**, 337-349, doi:10.1038/nrn3482 (2013).
- 601 7 Srivastava, P. K. *et al.* A systems-level framework for drug discovery identifies Csf1R as an anti-epileptic  
602 drug target. *Nat Commun* **9**, 3561, doi:10.1038/s41467-018-06008-4 (2018).
- 603 8 Pitkanen, A. *et al.* Issues related to development of antiepileptogenic therapies. *Epilepsia* **54 Suppl 4**, 35-43,  
604 doi:10.1111/epi.12297 (2013).
- 605 9 Gorter, J. A. *et al.* Potential new antiepileptogenic targets indicated by microarray analysis in a rat model for  
606 temporal lobe epilepsy. *J Neurosci* **26**, 11083-11110, doi:10.1523/JNEUROSCI.2766-06.2006 (2006).
- 607 10 Venugopal, A. K. *et al.* Transcriptomic Profiling of Medial Temporal Lobe Epilepsy. *J Proteomics*  
608 *Bioinform* **5**, doi:10.4172/jpb.1000210 (2012).
- 609 11 Hansen, K. F., Sakamoto, K., Pelz, C., Impney, S. & Obrietan, K. Profiling status epilepticus-induced changes  
610 in hippocampal RNA expression using high-throughput RNA sequencing. *Sci Rep* **4**, 6930,  
611 doi:10.1038/srep06930 (2014).
- 612 12 Henshall, D. C. *et al.* MicroRNAs in epilepsy: pathophysiology and clinical utility. *Lancet Neurol* **15**, 1368-  
613 1376, doi:10.1016/S1474-4422(16)30246-0 (2016).
- 614 13 Engel, T., Lucas, J. J. & Henshall, D. C. Targeting the proteasome in epilepsy. *Oncotarget* **8**, 45042-45043,  
615 doi:10.18632/oncotarget.18418 (2017).
- 616 14 Weill, L., Belloc, E., Bava, F. A. & Mendez, R. Translational control by changes in poly(A) tail length:  
617 recycling mRNAs. *Nat Struct Mol Biol* **19**, 577-585, doi:10.1038/nsmb.2311 (2012).
- 618 15 Richter, J. D. CPEB: a life in translation. *Trends Biochem Sci* **32**, 279-285, doi:10.1016/j.tibs.2007.04.004  
619 (2007).
- 620 16 Ivshina, M., Lasko, P. & Richter, J. D. Cytoplasmic polyadenylation element binding proteins in  
621 development, health, and disease. *Annu Rev Cell Dev Biol* **30**, 393-415, doi:10.1146/annurev-cellbio-  
622 101011-155831 (2014).
- 623 17 Si, K. *et al.* A neuronal isoform of CPEB regulates local protein synthesis and stabilizes synapse-specific  
624 long-term facilitation in aplysia. *Cell* **115**, 893-904 (2003).
- 625 18 Darnell, J. C. & Richter, J. D. Cytoplasmic RNA-binding proteins and the control of complex brain function.  
626 *Cold Spring Harb Perspect Biol* **4**, a012344, doi:10.1101/cshperspect.a012344 (2012).
- 627 19 Tseng, C. S., Chao, H. W., Huang, H. S. & Huang, Y. S. Olfactory-Experience- and Developmental-Stage-  
628 Dependent Control of CPEB4 Regulates c-Fos mRNA Translation for Granule Cell Survival. *Cell Rep* **21**,  
629 2264-2276, doi:10.1016/j.celrep.2017.10.100 (2017).
- 630 20 Kan, M. C. *et al.* CPEB4 is a cell survival protein retained in the nucleus upon ischemia or endoplasmic  
631 reticulum calcium depletion. *Mol Cell Biol* **30**, 5658-5671, doi:10.1128/MCB.00716-10 (2010).
- 632 21 Parras, A. *et al.* Autism-like phenotype and risk gene mRNA deadenylation by CPEB4 mis-splicing. *Nature*  
633 **560**, 441-446, doi:10.1038/s41586-018-0423-5 (2018).
- 634 22 Theis, M., Si, K. & Kandel, E. R. Two previously undescribed members of the mouse CPEB family of genes  
635 and their inducible expression in the principal cell layers of the hippocampus. *Proc Natl Acad Sci U S A* **100**,  
636 9602-9607, doi:10.1073/pnas.1133424100 (2003).
- 637 23 Udagawa, T. *et al.* Genetic and acute CPEB1 depletion ameliorate fragile X pathophysiology. *Nat Med* **19**,  
638 1473-1477, doi:10.1038/nm.3353 (2013).
- 639 24 Mouri, G. *et al.* Unilateral hippocampal CA3-predominant damage and short latency epileptogenesis after  
640 intra-amygdala microinjection of kainic acid in mice. *Brain Res* **1213**, 140-151,  
641 doi:10.1016/j.brainres.2008.03.061 (2008).
- 642 25 Huang da, W., Sherman, B. T. & Lempicki, R. A. Systematic and integrative analysis of large gene lists  
643 using DAVID bioinformatics resources. *Nat Protoc* **4**, 44-57, doi:10.1038/nprot.2008.211 (2009).
- 644 26 Wang, J. *et al.* Epilepsy-associated genes. *Seizure* **44**, 11-20, doi:10.1016/j.seizure.2016.11.030 (2017).
- 645 27 Epi, K. c. & Epilepsy Phenome/Genome, P. Ultra-rare genetic variation in common epilepsies: a case-  
646 control sequencing study. *Lancet Neurol* **16**, 135-143, doi:10.1016/S1474-4422(16)30359-3 (2017).

- 647 28 International League Against Epilepsy Consortium on Complex, E. Genome-wide mega-analysis identifies  
648 16 loci and highlights diverse biological mechanisms in the common epilepsies. *Nat Commun* **9**, 5269,  
649 doi:10.1038/s41467-018-07524-z (2018).
- 650 29 Charlesworth, A., Meijer, H. A. & de Moor, C. H. Specificity factors in cytoplasmic polyadenylation. *Wiley*  
651 *Interdiscip Rev RNA* **4**, 437-461, doi:10.1002/wrna.1171 (2013).
- 652 30 Lebedeva, S. *et al.* Transcriptome-wide analysis of regulatory interactions of the RNA-binding protein HuR.  
653 *Mol Cell* **43**, 340-352, doi:10.1016/j.molcel.2011.06.008 (2011).
- 654 31 Zhang, M. *et al.* Post-transcriptional regulation of mouse neurogenesis by Pumilio proteins. *Genes Dev* **31**,  
655 1354-1369, doi:10.1101/gad.298752.117 (2017).
- 656 32 Curia, G., Longo, D., Biagini, G., Jones, R. S. & Avoli, M. The pilocarpine model of temporal lobe epilepsy.  
657 *J Neurosci Methods* **172**, 143-157, doi:10.1016/j.jneumeth.2008.04.019 (2008).
- 658 33 Calderone, V. *et al.* Sequential Functions of CPEB1 and CPEB4 Regulate Pathologic Expression of Vascular  
659 Endothelial Growth Factor and Angiogenesis in Chronic Liver Disease. *Gastroenterology* **150**, 982-997  
660 e930, doi:10.1053/j.gastro.2015.11.038 (2016).
- 661 34 Shinoda, S. *et al.* Development of a model of seizure-induced hippocampal injury with features of  
662 programmed cell death in the BALB/c mouse. *J Neurosci Res* **76**, 121-128, doi:10.1002/jnr.20064 (2004).
- 663 35 Bialer, M. & White, H. S. Key factors in the discovery and development of new antiepileptic drugs. *Nat Rev*  
664 *Drug Discov* **9**, 68-82, doi:10.1038/nrd2997 (2010).
- 665 36 Pitkanen, A., Lukasiuk, K., Dudek, F. E. & Staley, K. J. Epileptogenesis. *Cold Spring Harb Perspect Med* **5**,  
666 doi:10.1101/cshperspect.a022822 (2015).
- 667 37 Curinha, A., Oliveira Braz, S., Pereira-Castro, I., Cruz, A. & Moreira, A. Implications of polyadenylation in  
668 health and disease. *Nucleus* **5**, 508-519, doi:10.4161/nucl.36360 (2014).
- 669 38 Si, K. & Kandel, E. R. The Role of Functional Prion-Like Proteins in the Persistence of Memory. *Cold*  
670 *Spring Harb Perspect Biol* **8**, a021774, doi:10.1101/cshperspect.a021774 (2016).
- 671 39 Ince-Dunn, G. *et al.* Neuronal Elav-like (Hu) proteins regulate RNA splicing and abundance to control  
672 glutamate levels and neuronal excitability. *Neuron* **75**, 1067-1080, doi:10.1016/j.neuron.2012.07.009 (2012).
- 673 40 Follwaczny, P. *et al.* Pumilio2-deficient mice show a predisposition for epilepsy. *Dis Model Mech* **10**, 1333-  
674 1342, doi:10.1242/dmm.029678 (2017).
- 675 41 Tsai, L. Y. *et al.* CPEB4 knockout mice exhibit normal hippocampus-related synaptic plasticity and  
676 memory. *PLoS One* **8**, e84978, doi:10.1371/journal.pone.0084978 (2013).
- 677 42 Engel, T. *et al.* CHOP regulates the p53-MDM2 axis and is required for neuronal survival after seizures.  
678 *Brain* **136**, 577-592, doi:10.1093/brain/aws337 (2013).
- 679 43 Belloc, E. & Mendez, R. A deadenylation negative feedback mechanism governs meiotic metaphase arrest.  
680 *Nature* **452**, 1017-1021, doi:10.1038/nature06809 (2008).
- 681 44 Team, R. D. C. R: A language and environment for statistical computing. *R Foundation for Statistical*  
682 *Computing* (2014).
- 683 45 Gentleman, R. C. *et al.* Bioconductor: open software development for computational biology and  
684 bioinformatics. *Genome Biol* **5**, R80, doi:10.1186/gb-2004-5-10-r80 (2004).
- 685 46 Irizarry, R. A. *et al.* Exploration, normalization, and summaries of high density oligonucleotide array probe  
686 level data. *Biostatistics* **4**, 249-264, doi:10.1093/biostatistics/4.2.249 (2003).
- 687 47 Gentleman, R. Reproducible research: a bioinformatics case study. *Stat Appl Genet Mol Biol* **4**, Article2,  
688 doi:10.2202/1544-6115.1034 (2005).
- 689 48 Eklund, A. C. & Szallasi, Z. Correction of technical bias in clinical microarray data improves concordance  
690 with known biological information. *Genome Biol* **9**, R26, doi:10.1186/gb-2008-9-2-r26 (2008).
- 691 49 Ritchie, M. E. *et al.* limma powers differential expression analyses for RNA-sequencing and microarray  
692 studies. *Nucleic Acids Res* **43**, e47, doi:10.1093/nar/gkv007 (2015).
- 693 50 Schneider, C. A., Rasband, W. S. & Eliceiri, K. W. NIH Image to ImageJ: 25 years of image analysis. *Nat*  
694 *Methods* **9**, 671-675 (2012).
- 695 51 Jimenez-Mateos, E. M. *et al.* Silencing microRNA-134 produces neuroprotective and prolonged seizure-  
696 suppressive effects. *Nat Med* **18**, 1087-1094, doi:10.1038/nm.2834 (2012).
- 697 52 Engel, T. *et al.* Bi-directional genetic modulation of GSK-3beta exacerbates hippocampal neuropathology in  
698 experimental status epilepticus. *Cell Death Dis* **9**, 969, doi:10.1038/s41419-018-0963-5 (2018).

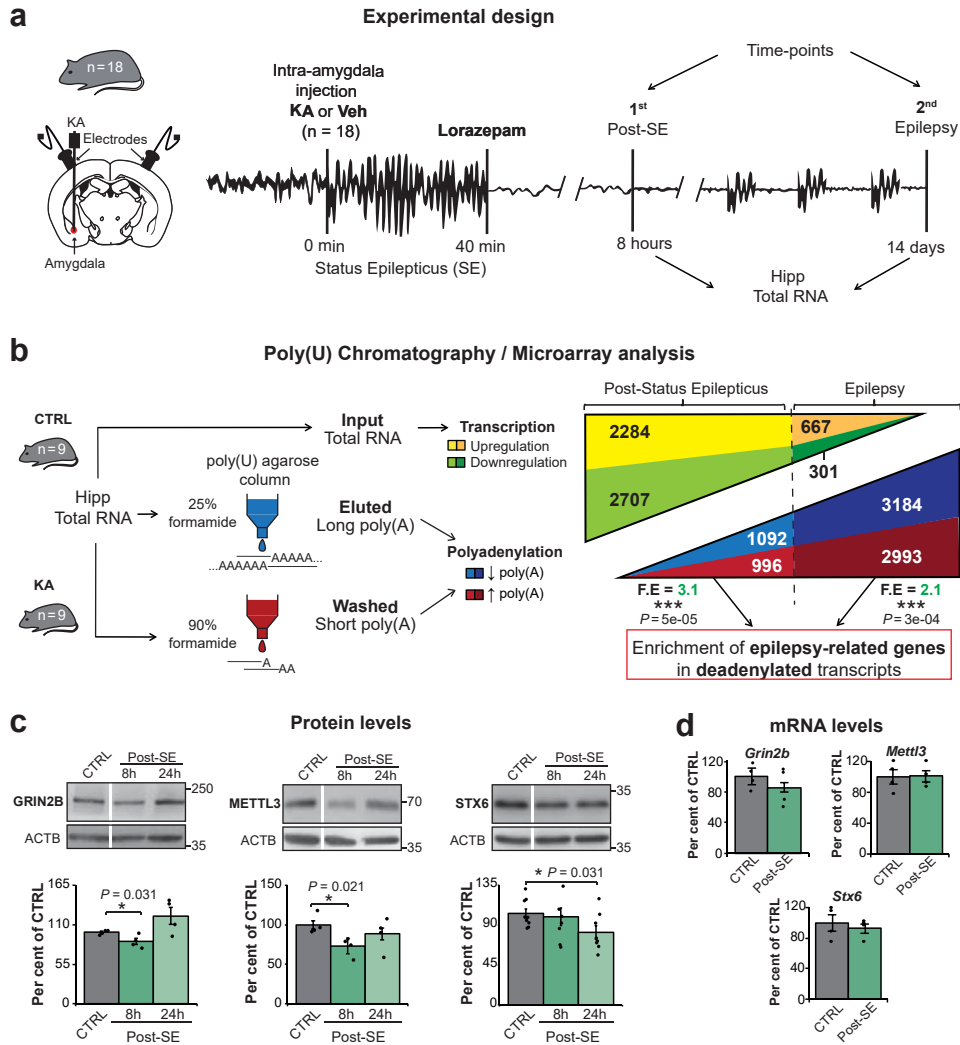

**Fig. 1 | Genome-wide mRNA polyadenylation changes following status epilepticus and during epilepsy.**

**a**, Schematic showing the experimental design using the intraamygdala KA mouse model of acquired epilepsy. Hippocampi were collected at two time-points: 8 hours post-status epilepticus (acute injury,  $n = 9$ ) and 14 days post-status epilepticus (epilepsy,  $n = 9$ ). KA, kainic acid; SE, status epilepticus. **b**, Experimental design of poly(U) chromatography and microarray analysis (left) and comparison between genes with dysregulated transcription vs. mRNA polyadenylation changes (right) (Total amount of analyzed genes = 21566). F.E, fold enrichment. **c**, Protein levels in the ipsilateral hippocampus of WT mice injected with vehicle (Control) vs. KA (status epilepticus) at 8 h and 24 h post-status epilepticus of GRIN2B ( $n = 4$ ), METTL3 ( $n = 4$ ) and STX6 ( $n = 8$ ). CTRL, control; WT, wildtype; SE, status epilepticus. **d**, mRNA levels in the ipsilateral hippocampus at 8 h post-status epilepticus, vehicle vs. KA-treated mice ( $n = 4$ ). Data were analyzed and normalized to the expression of ACTB. **b**, One-sided Fisher's exact test,  $P$  values of deadenylated epilepsy-related genes versus total deadenylated transcripts. **c**, **d**, Two-sided unpaired t-test. Data are mean  $\pm$  S.E.M. 95% CIs. \* $P < 0.05$ .

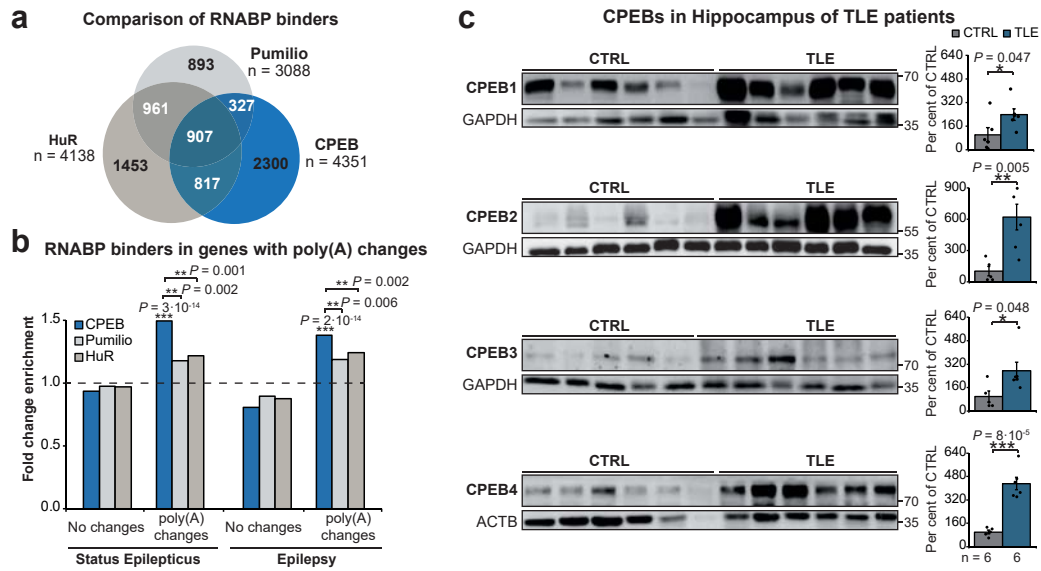

**Fig. 2 | Poly(A) changes in RNABP binders and CPEBs expression in TLE.**

**a**, Venn diagram of identified targets of main RNABP families implicated in polyadenylation: PUMILIO, HUR and CPEBs. RNABP, RNA Binding Protein. **b**, Enrichment of RNABP binders of genes undergoing poly(A) tail changes post-status epilepticus and during epilepsy. **c**, CPEB protein levels in the hippocampus of control and patients with TLE (n = 6 per group). Protein quantity was normalized to the loading control (ACTB or GAPDH). TLE, Temporal Lobe Epilepsy; **b**, One-sided Fisher's exact test. **c**, Two-sided unpaired t-test. Data are mean  $\pm$  S.E.M. 95% CIs. \* $P < 0.05$ , \*\* $P < 0.01$ , \*\*\* $P < 0.001$ .

### CPEB hippocampal expression in intraamygdala KA mouse model

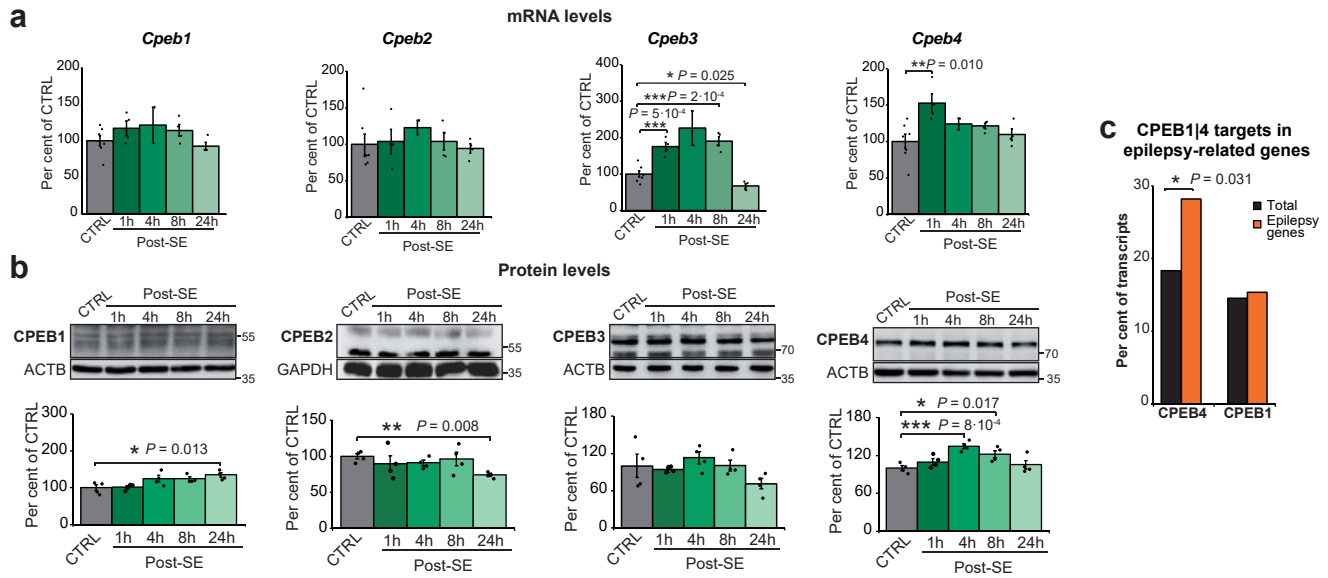

**Fig. 3 | Expression of CPEBs in intraamygdala KA mouse model**

**a**, mRNA levels of *Cpebs* in the ipsilateral hippocampus of WT mice injected with vehicle (CTRL) vs. KA at 1 h, 4 h, 8 h and 24 h post-status epilepticus (post-SE) ( $n = 4$ ). Data were analyzed and normalized to the expression of *Actb*. **b**, Protein levels of CPEB family members at same time-points (vehicle  $n = 7$ , KA  $n = 4$ ). Protein quantity was normalized to the loading control (ACTB or GAPDH). **c**, Percentage of transcripts bound by CPEB4 and CPEB1 in whole transcriptome and in epilepsy-related genes. **a**, **b**, Two-sided unpaired t-test, **c**, One-sided Fisher's exact test. Data are mean  $\pm$  S.E.M. 95% CIs. \* $P < 0.05$ , \*\* $P < 0.01$ , \*\*\* $P < 0.001$ .

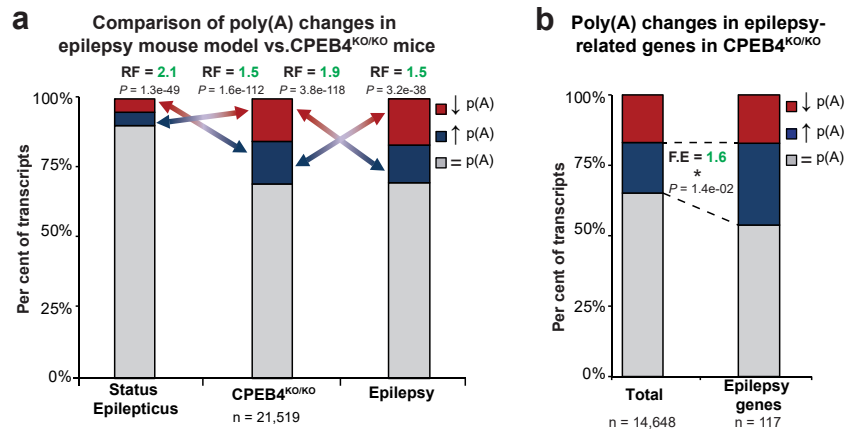

**Fig. 4 | CPEB4 as main driver of poly(A) changes in epilepsy**

**a**, Comparison of genes with poly(A)-tail changes in CPEB4<sup>KO/KO</sup> and genes with changes in poly(A) tail length post-status epilepticus and during epilepsy; RF, representation factor; FE, fold enrichment. **b**, Percentage of epilepsy-related genes with poly(A) tail changes in CPEB4<sup>KO/KO</sup>. **a**, Hypergeometric test. **b**, One-sided Fisher's exact test, *P* values of epilepsy-related transcripts lengthened vs. total.

### Intraamygdala KA mouse model

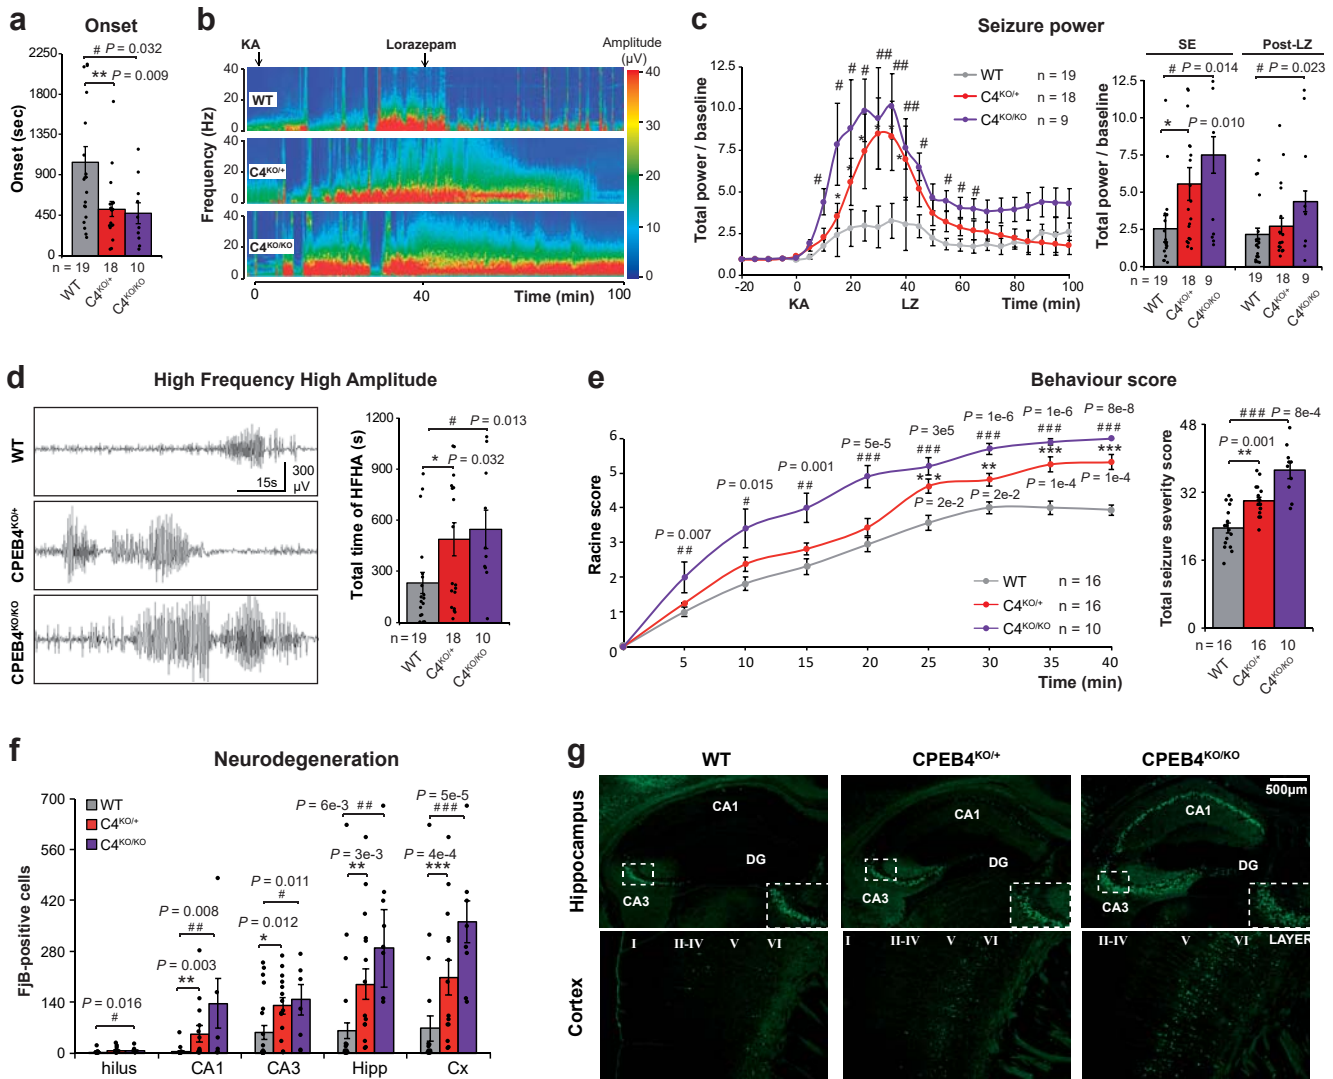

**Fig. 5 | CPEB4-deficiency increases seizure susceptibility during status epilepticus and seizure-induced brain damage.**

**a**, Later seizure onset in CPEB4-deficient mice. **b**, Representative heatmap showing increased total seizure power during a 100 min recording period starting from intra-amygdala KA injection ( $t = 0$ ). **c**, Total power normalized to baseline post-KA injection represented in 5 min segments during status epilepticus (0 – 40 min) and post-LZ administration (40 – 100 min). LZ, lorazepam. **d**, Representative electroencephalogram (EEG) traces during status epilepticus and total time of high-frequency high-amplitude (HFHA) spiking. **e**, Behavioral severity of seizures (mean Racine score) scored each 5 min and total score. **f**, Quantitative analysis of Fluoro-Jade-B (FJB) positive cells and **g**, representative sections of neurodegeneration in ipsilateral cortex and hippocampus 72 h post-status epilepticus. Data are mean  $\pm$  S.E.M. 95% CIs. WT vs CPEB4<sup>KO/+</sup> \* $P < 0.05$ , \*\* $P < 0.01$ . WT vs CPEB4<sup>KO/KO</sup> # $P < 0.05$ , ## $P < 0.01$ , ### $P < 0.001$ .
